# Supplementary material
Source: MDPI journal article supplement (https://www.mdpi.com/2227-7390/9/19/2527)
Supplement: s1 [file s1]

## Article

# ABS-based direct method for solving complex systems of linear equations

József Abaffy<sup>1</sup> and Szabina Fodor<sup>2\*</sup> 

<sup>1</sup> Institute of Applied Mathematics, Óbuda University; Bécsi út 96/b, 1034 Budapest, Hungary; jozsef.abaffy@uni-obuda.hu

<sup>2</sup> Department of Computer Science, Corvinus University of Budapest; Fővám tér 13-15, 1093 Budapest, Hungary; szabina.fodor@uni-corvinus.hu

\* Correspondence: szabina.fodor@uni-corvinus.hu; Tel.: +36-1-482-7468 (S.F.)

## 1 Supplementary Materials

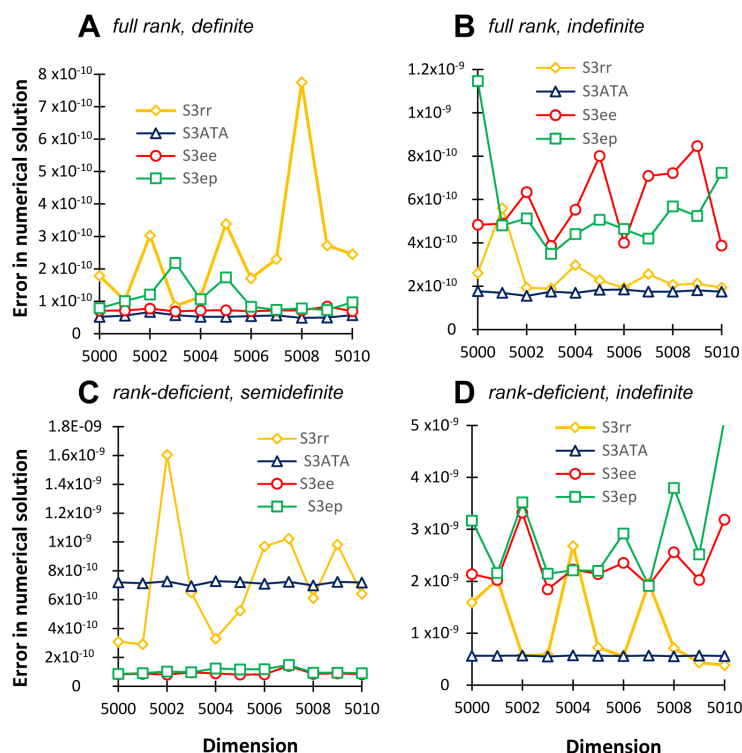

**Figure S1.** Comparative analysis of the four variants of the orthogonally scaled complex ABS algorithm on randomly generated dense complex systems of linear equations

**Citation:** Abaffy, J.; Fodor, S. Complex ABS. *Mathematics* **2021**, *1*, 0. <https://doi.org/>

Received:

Accepted:

Published:

**Publisher's Note:** MDPI stays neutral with regard to jurisdictional claims in published maps and institutional affiliations.

**Copyright:** © 2021 by the authors. Submitted to *Mathematics* for possible open access publication under the terms and conditions of the Creative Commons Attribution (CC BY) license (<https://creativecommons.org/licenses/by/4.0/>).

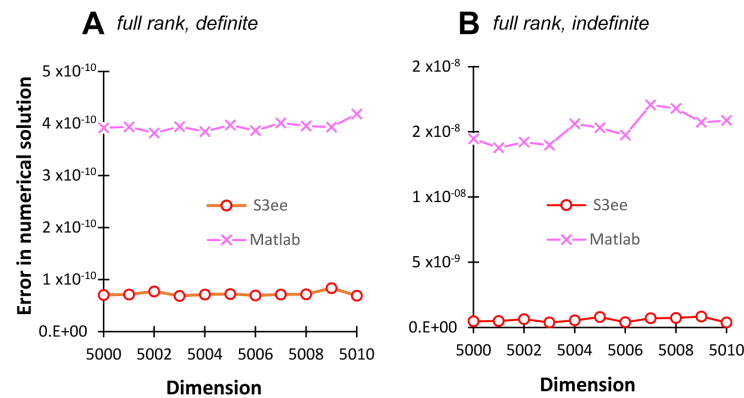

**Figure S2.** Comparative analysis of the S3ee implementation of the orthogonally scaled ABS algorithm and the Matlab *mldivide* function on randomly generated dense complex systems of linear equations.

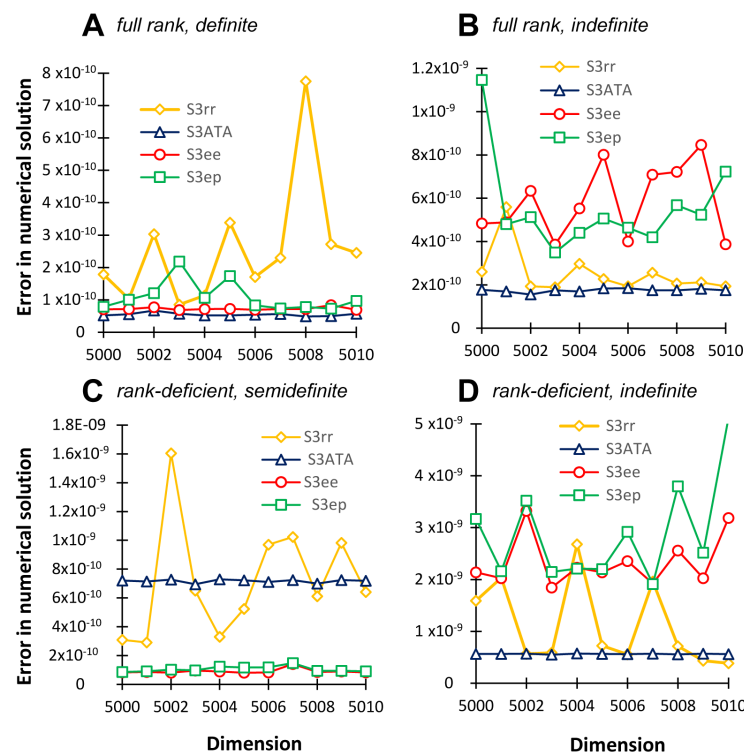

**Figure S3.** Comparative analysis of the four variants of the orthogonally scaled complex ABS algorithm on selected Matlab Gallery problems.

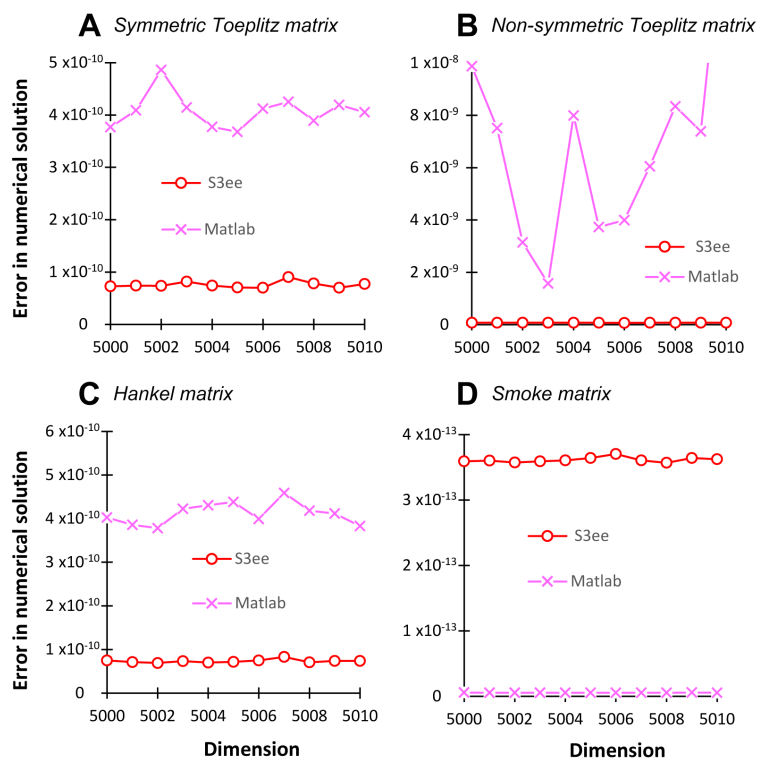

**Figure S4.** Comparative analysis of the computational accuracy of the ABS-based S3ee algorithm and the Matlab *mldivide* algorithm on selected Matlab gallery problems.
